# Supplementary material for: Enabling low amounts of YAG:Ce3+to convert blue into white light with plasmonic Au nanoparticles
Source: Royal Society of Chemistry journal article supplement (doi:10.1039/c5nr01038a), 2015-01-01
Supplement: c5nr01038a1.pdf [file c5nr01038a1.pdf]

COMMUNICATION

## Enable Low-Amount YAG:Ce<sup>3+</sup> to Convert into White Light with Plasmonic Au Nanoparticles

Talib Hussain,<sup>abe</sup> Liubiao Zhong,<sup>b</sup> Mohammad Danesh,<sup>d</sup> Huiqi Ye,<sup>a</sup> Ziqiang Liang,<sup>b</sup> Dong Xiao,<sup>a</sup> Cheng-Wei Qiu,<sup>d</sup> Chaogang Lou,<sup>e</sup> Lifeng Chi,<sup>\*b</sup> and Lin Jiang<sup>\*b</sup>

<sup>a</sup> National Astronomical Observatories / Nanjing Institute of Astronomical Optics & Technology, Key Laboratory of Astronomical Optics & Technology, Nanjing Institute of Astronomical Optics & Technology, Chinese Academy of Sciences, Nanjing, Jiangsu, 210042, P. R. China.

<sup>b</sup> Institute of Functional Nano & Soft Materials (FUNSOM) and Collaborative Innovation Center of Suzhou Nano Science & Technology, Soochow University, Suzhou, Jiangsu 215123, P. R. China.

\* E-mail: [ljiang@suda.edu.cn](mailto:ljiang@suda.edu.cn); [chilf@suda.edu.cn](mailto:chilf@suda.edu.cn)

<sup>c</sup> Department of Electrical and Computer Engineering, National University of Singapore, 4 Engineering Drive 3, Singapore 117576, Singapore.

<sup>d</sup> School of Electronic Science & Engineering, Southeast University, Nanjing, 210096, P.R. China.

<sup>e</sup> University of Chinese Academy of Sciences, Beijing, 100049, P. R. China.

### Supplementary Information

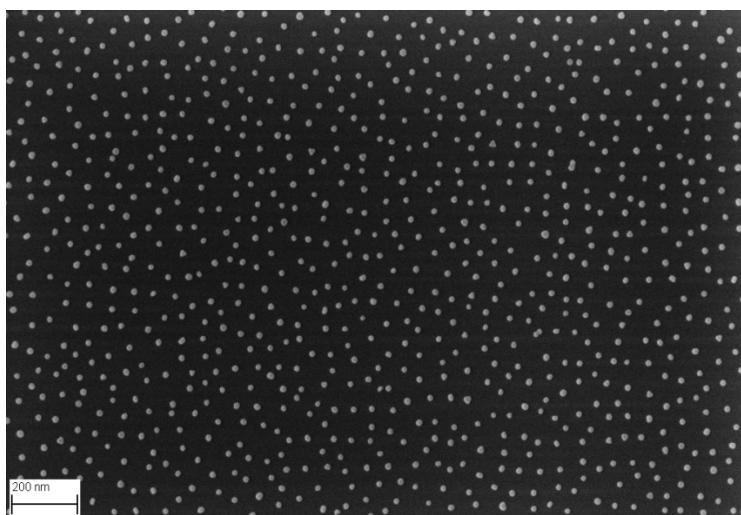

**Figure S1** SEM image of 21 nm Au nanoparticles.

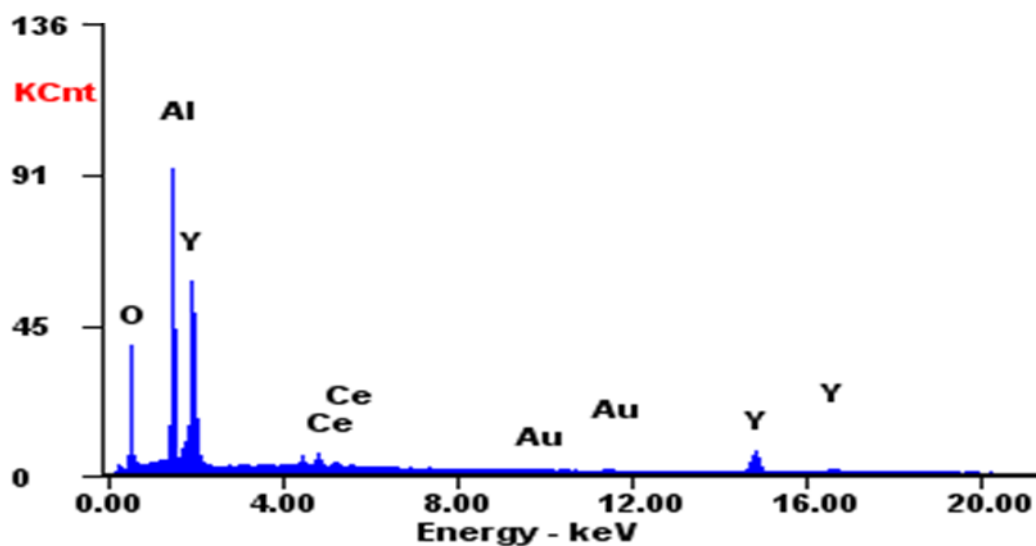

Figure. S2 EDX of YAG:Ce<sup>3+</sup>/Au nanoparticles

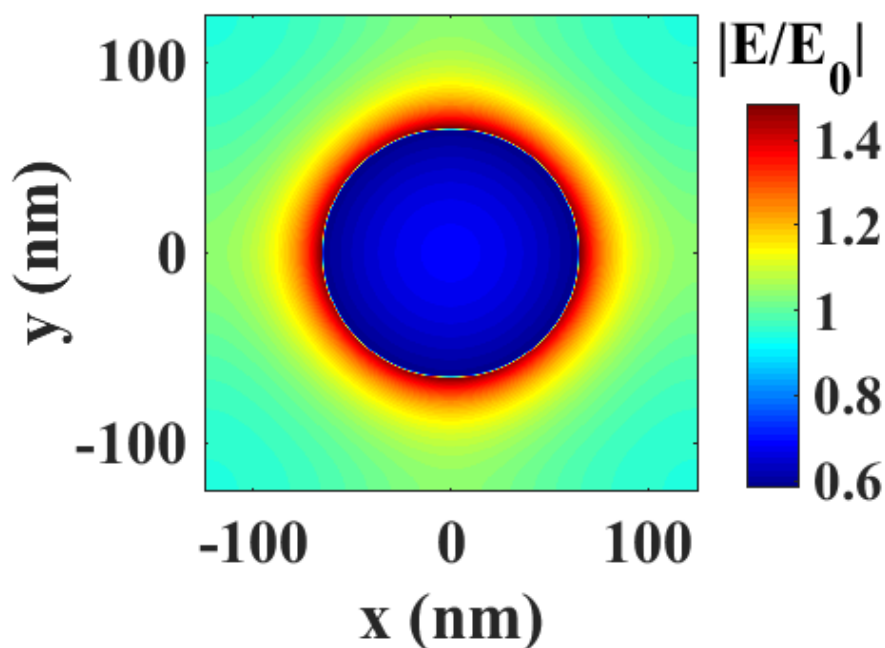

Figure. S3 Electric profile of phosphor at Au nanoparticle's absorption peak. It can be seen that the electric field is strongest at the surface of the phosphor particle resulting in higher sensitivity to changes in material in this area.

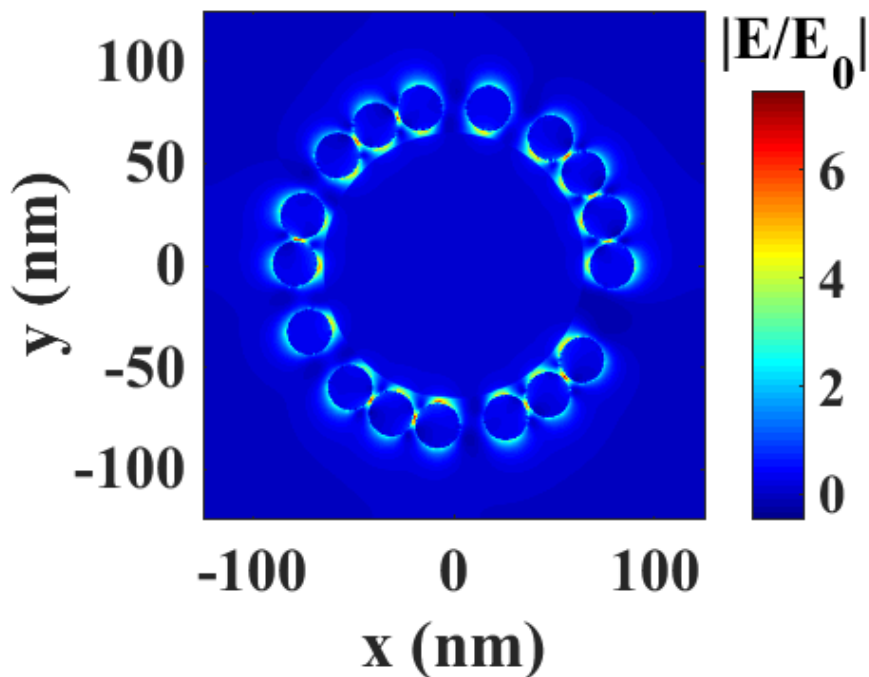

**Figure. S4** The electric field contrast by adding Au nanoparticles randomly distributed onto the phosphor at gold absorption peak.

**Table S1** Performance comparison of five phosphor/Au nanoparticles converted white LED devices

| Device | Phosphor Amount (mg/cm <sup>2</sup> ) | Luminance (cd/m <sup>2</sup> ) | CIE <sub>xy</sub> |      | LE (lm/W) | CRI | CCT (K) |
|--------|---------------------------------------|--------------------------------|-------------------|------|-----------|-----|---------|
| 1      | 1.39                                  | 10020                          | 0.21              | 0.2  | 32        | --- | ---     |
| 2      | 1.99                                  | 10250                          | 0.27              | 0.28 | 33        | 76  | 11310   |
| 3      | 3.36                                  | 11490                          | 0.30              | 0.33 | 36        | 78  | 6601    |
| 4      | 4.43                                  | 12440                          | 0.31              | 0.34 | 40        | 79  | 6362    |
| 5      | 5.18                                  | 12360                          | 0.34              | 0.4  | 39        | 72  | 4906    |

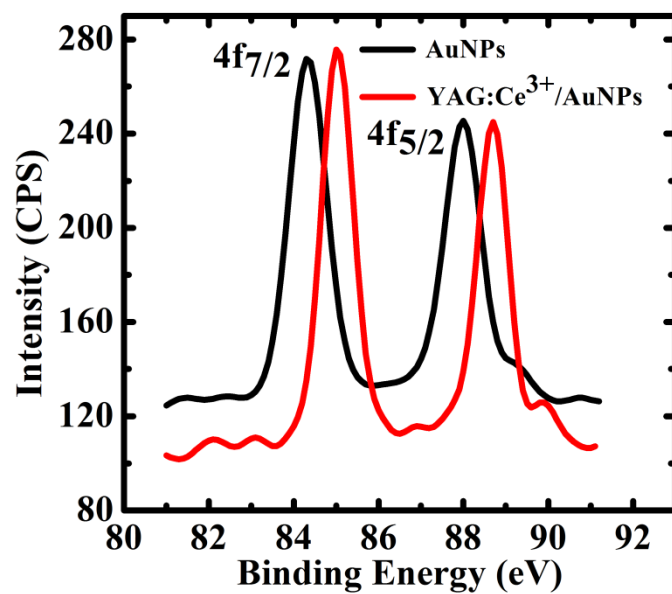

**Figure. S5** XPS spectra of Au nanoparticles that shows the binding energies before and after modification with YAG:Ce<sup>3+</sup>
